# Supplementary material for: E2 Partner Tunes the Ubiquitylation Specificity of Arkadia E3 Ubiquitin Ligase
Source: Cancers (Basel). 2023 Feb 7;15(4):1040. doi: 10.3390/cancers15041040 (PMC9954413; doi:10.3390/cancers15041040)
Supplement: Supplementary file 1 [file cancers-15-01040-s001.zip › cancers-2148865-supplementary File S1.pdf]

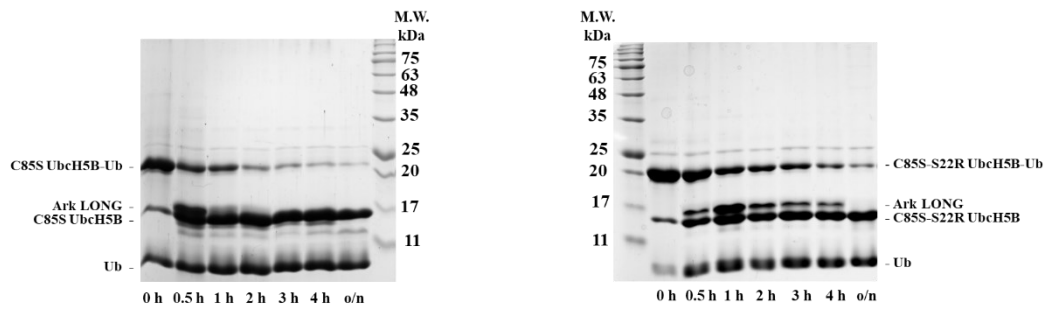

**Figure S9.** Oxyester hydrolysis assays showing the disappearance of C85S UbcH5B-Ub (left) and C85S S22R UbcH5B-Ub (right) in the presence of AKD LONG, over time.

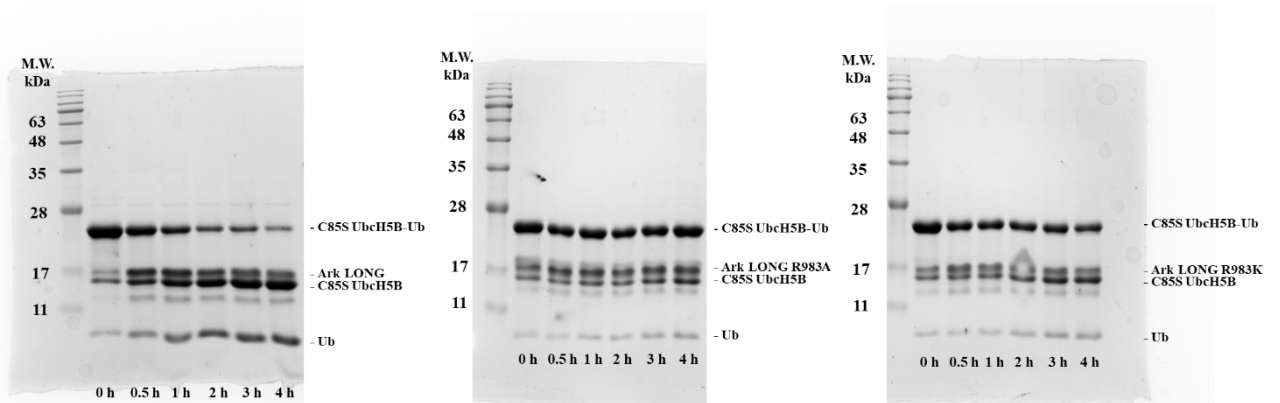

**Figure S10.** Oxyester hydrolysis assays showing the disappearance of C85S UbcH5B-Ub in the presence of Ark LONG, Ark LONG R983A and Ark LONG R983K respectively, over time.

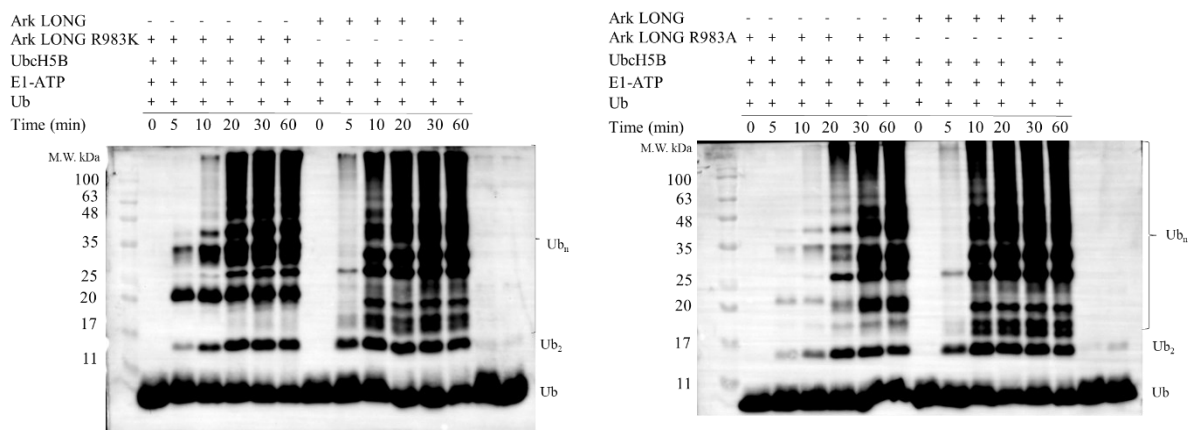

**Figure S11.** In vitro ubiquitination assays of Ark LONG R983K (left) and Ark LONG R983A (right) in comparison to wt Ark LONG.
